# Supplementary material for: Synergistic catalysis of imidazole acetate ionic liquids for the methanolysis of spiral poly(ethylene 2,5-furandicarboxylate) under a mild condition
Source: Royal Society of Chemistry journal article supplement (doi:10.1039/d0gc04019c), 2021-01-01
Supplement: d0gc04019c1.pdf [file d0gc04019c1.pdf]

## Supporting information

### A Synergistic Catalysis of Imidazole Acetate Ionic Liquids for Methanolysis of Spiral Poly (ethylene 2,5-furandicarboxylate) under a Mild Condition

Xiaoling Qu,<sup>a,b</sup> Guangyuan Zhou,<sup>b</sup> Rui Wang,<sup>b</sup> Bolei Yuan,<sup>a</sup> Min Jiang<sup>\*b</sup> and Jun Tang<sup>\*a</sup>

#### Characterization of the IL catalysts

Series of tetrabutylphosphonium-based ILs were synthesized, and their structures were determined by <sup>1</sup>H NMR, <sup>13</sup>C NMR, and <sup>31</sup>P NMR. All the detailed characterization results are provided in Fig. S1–S22. The obtained spectra were in good accordance with the intended chemical structures. Taking <sup>1</sup>H NMR spectrum of [P<sub>4444</sub>][LAc] for example (Fig. S1), the signals at δ 1.22–1.21 ppm and 4.01–3.96 ppm could be attributed to H-a and H-b of the [CH<sub>3</sub>CHOHCOO]<sup>-</sup> anion. The chemical shifts of H-c, H-d, H-e and H-f in tetrabutylphosphonium cation were observed at δ 2.08–2.02 ppm, 1.48–1.31 ppm, and 0.83–0.80 ppm respectively. The thermal stability of the synthesized ILs was checked by thermogravimetric analysis (TGA), as shown in Fig. S25, and all of tetrabutylphosphonium-based ILs exhibited excellent thermal stability (*T*<sub>d</sub> 290–335 °C).

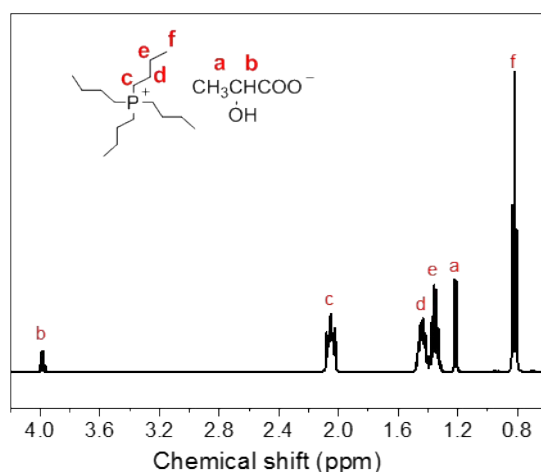

Fig. S1 <sup>1</sup>H NMR of P-LAc

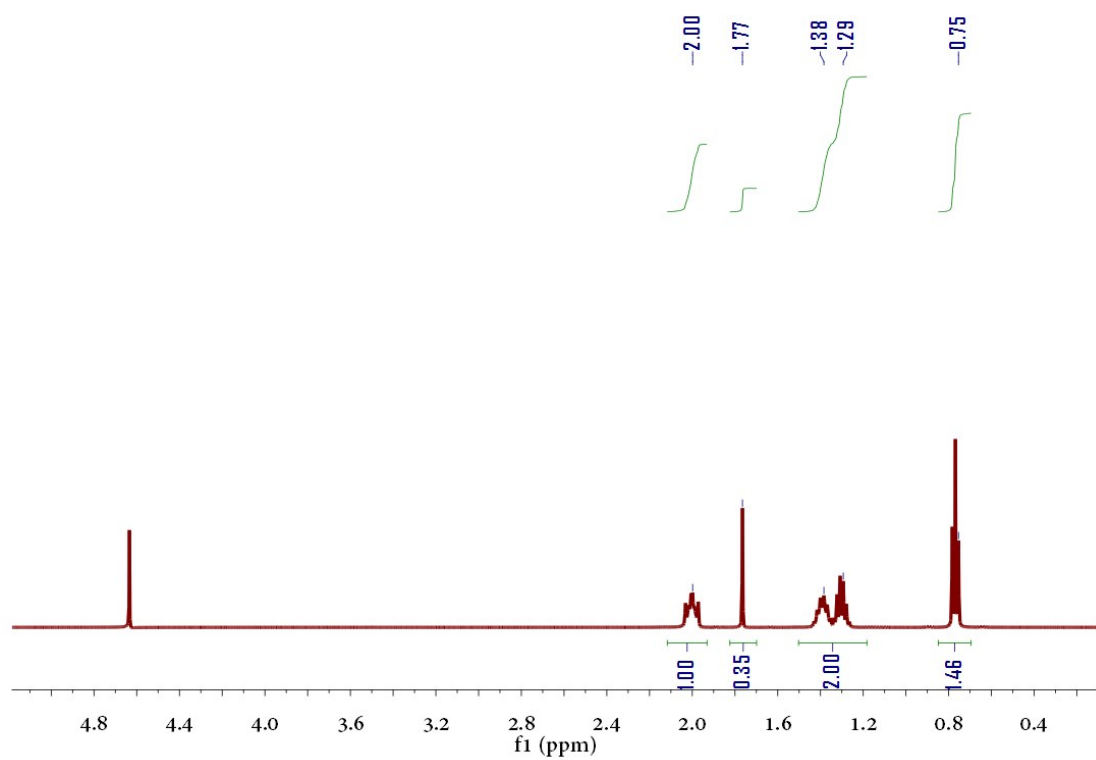

Fig. S2 The  $^1\text{H}$  NMR spectrum of  $[\text{P}_{4444}][\text{OAc}]$  ( $\text{D}_2\text{O}$ ).

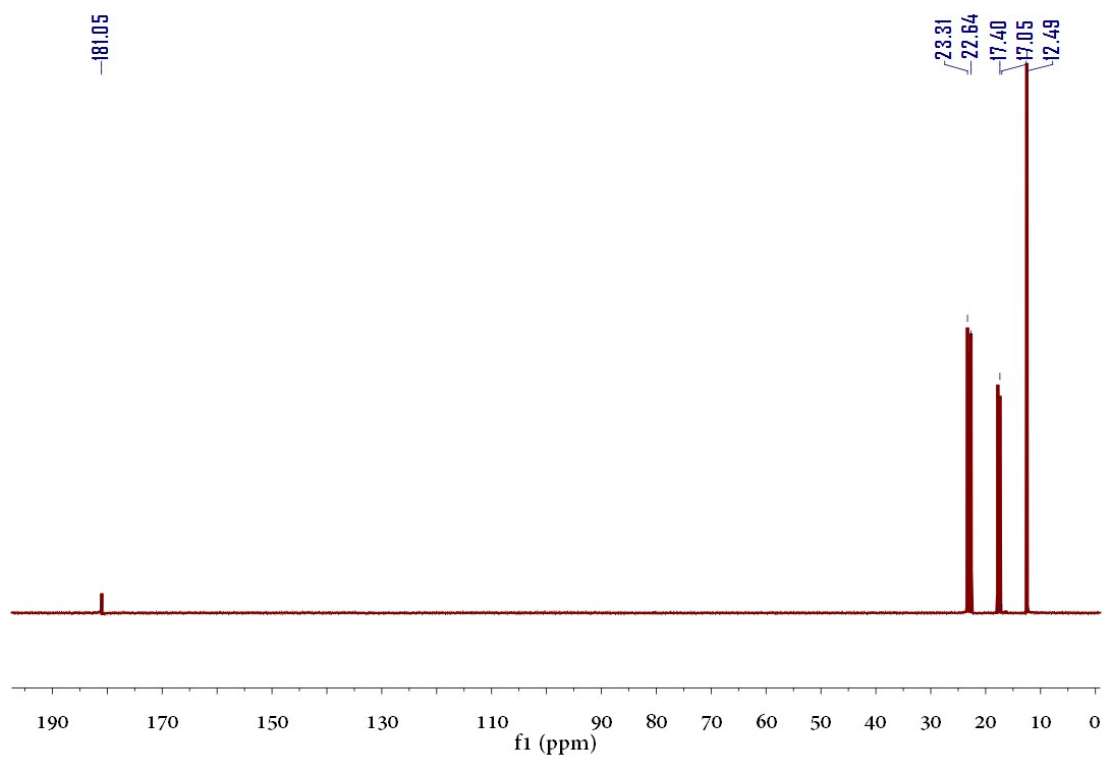

Fig. S3 The  $^{13}\text{C}$  NMR spectrum of  $[\text{P}_{4444}][\text{OAc}]$  ( $\text{D}_2\text{O}$ ).

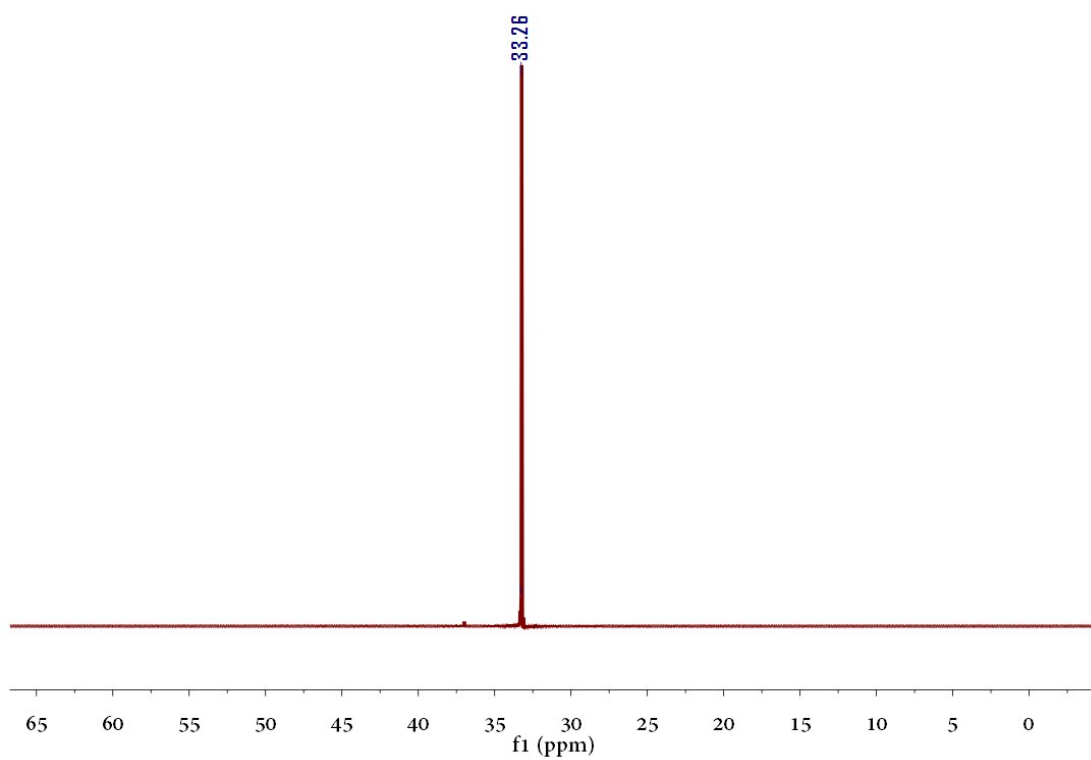

Fig. S4 The  $^{31}\text{P}$  NMR spectrum of  $[\text{P}_{4444}][\text{OAc}]$  ( $\text{D}_2\text{O}$ ).

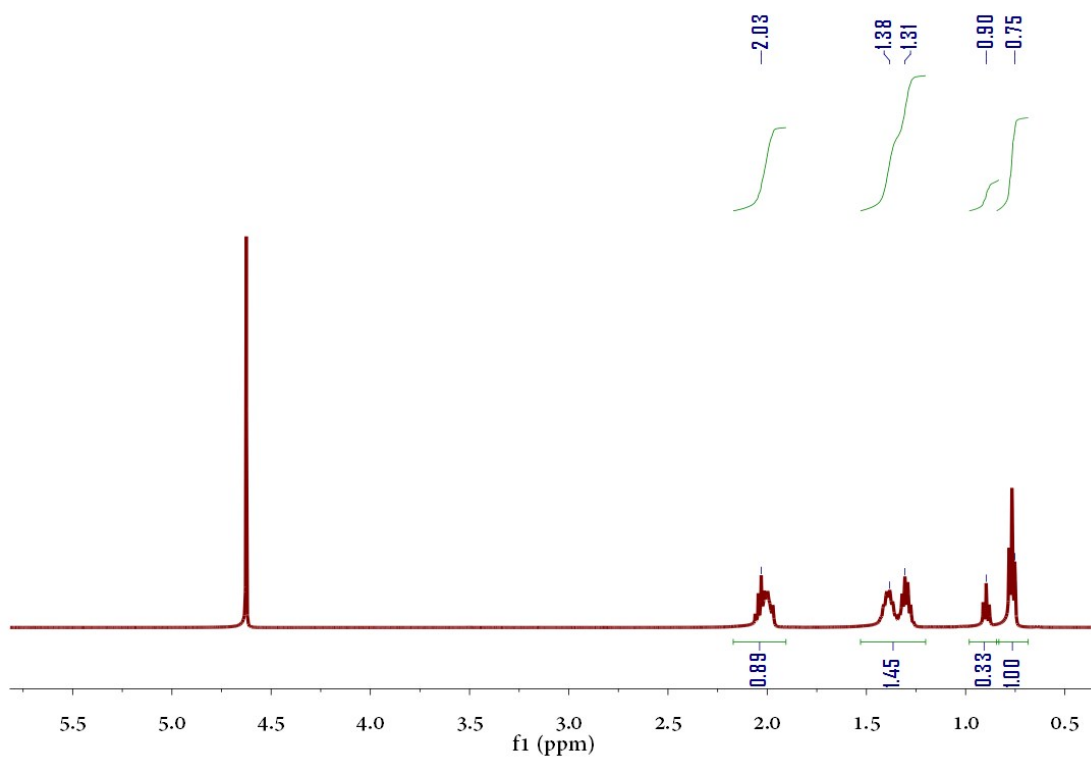

Fig. S5 The  $^1\text{H}$  NMR spectrum of  $[\text{P}_{4444}][\text{PAc}]$  ( $\text{D}_2\text{O}$ ).

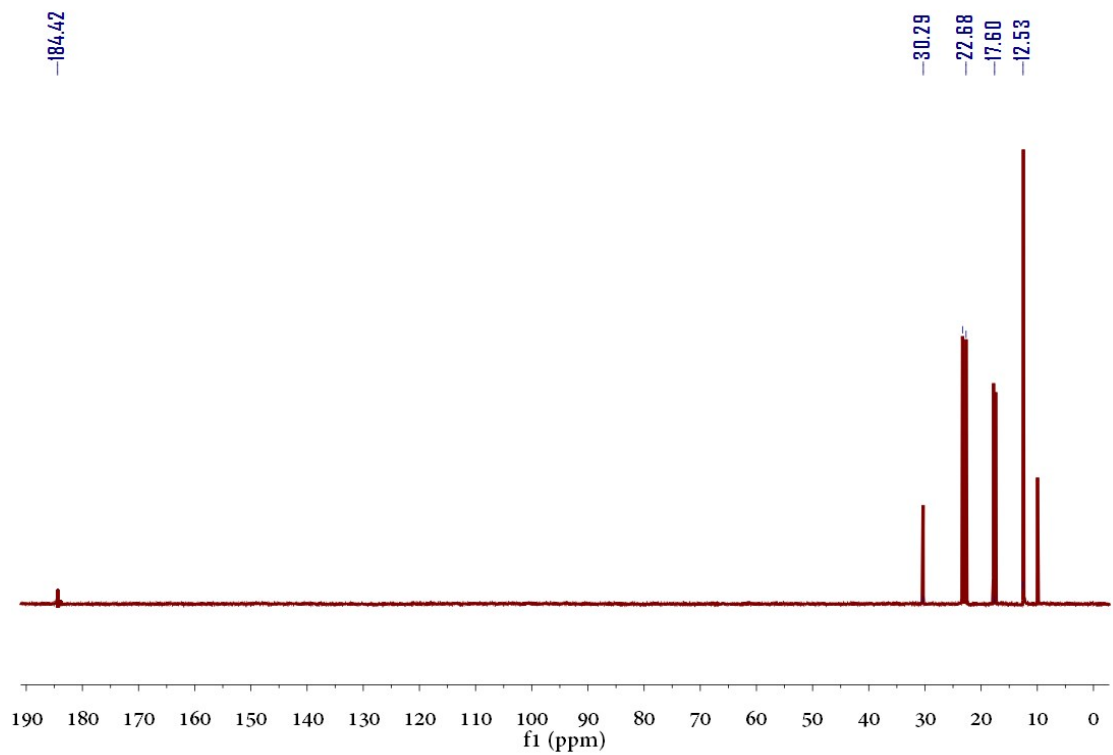

Fig. S6 The  $^{13}\text{C}$  NMR spectrum of  $[\text{P}_{4444}][\text{PAC}]$  ( $\text{D}_2\text{O}$ ).

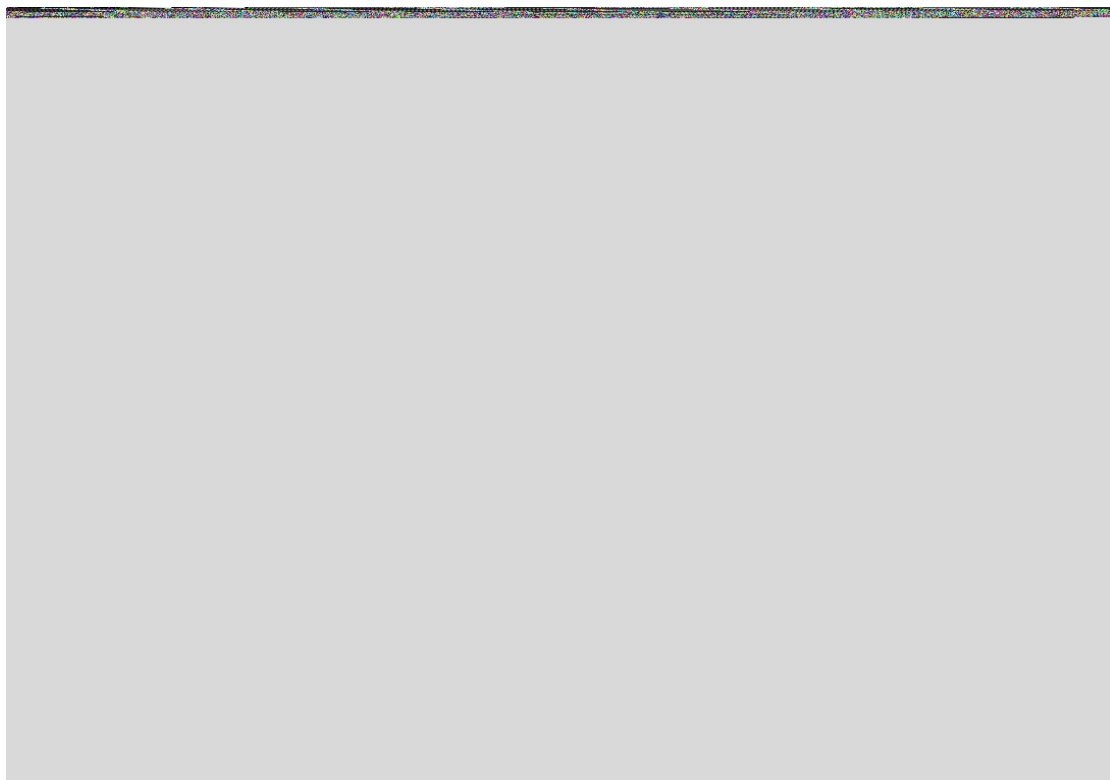

Fig. S7 The  $^{31}\text{P}$  NMR spectrum of  $[\text{P}_{4444}][\text{PAC}]$  ( $\text{D}_2\text{O}$ ).

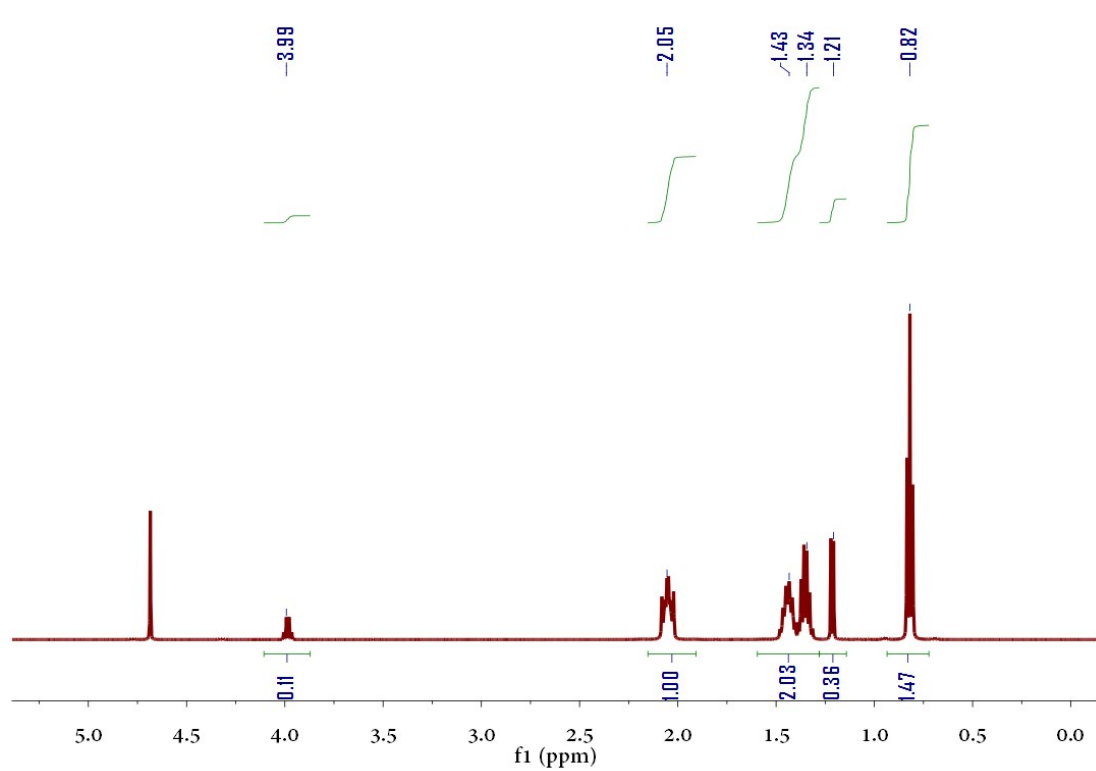

Fig. S8 The  $^1\text{H}$  NMR spectrum of  $[\text{P}_{4444}][\text{LAc}]$  ( $\text{D}_2\text{O}$ ).

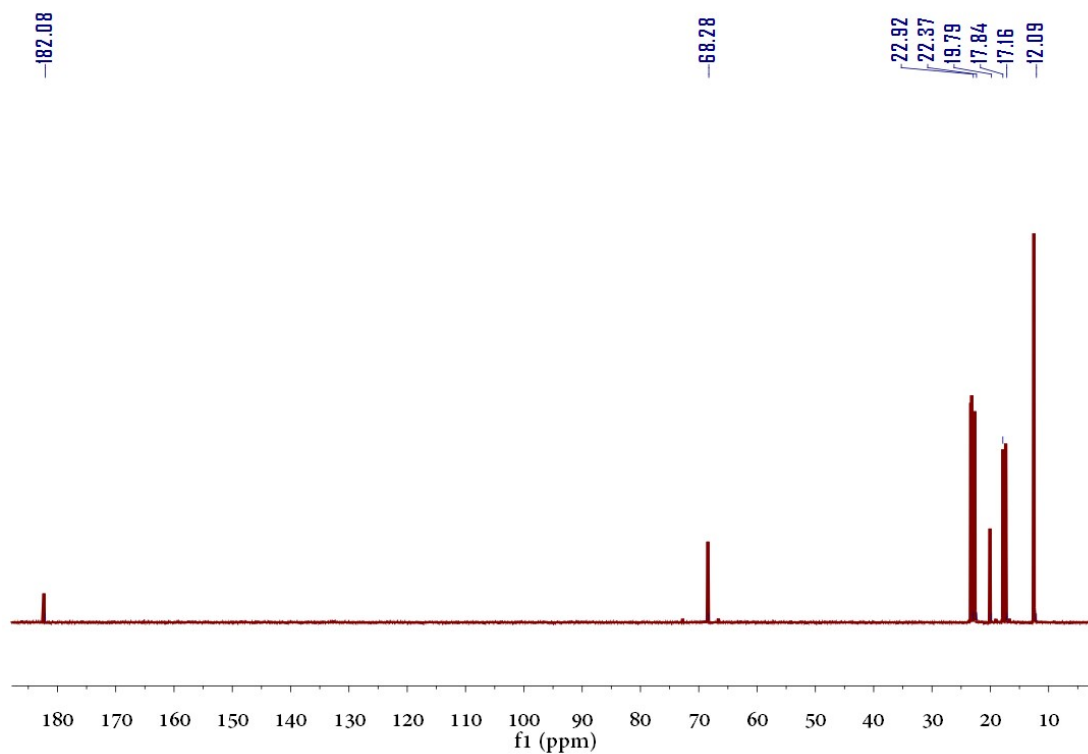

Fig. S9 The  $^{13}\text{C}$  NMR spectrum of  $[\text{P}_{4444}][\text{LAc}]$  ( $\text{D}_2\text{O}$ ).

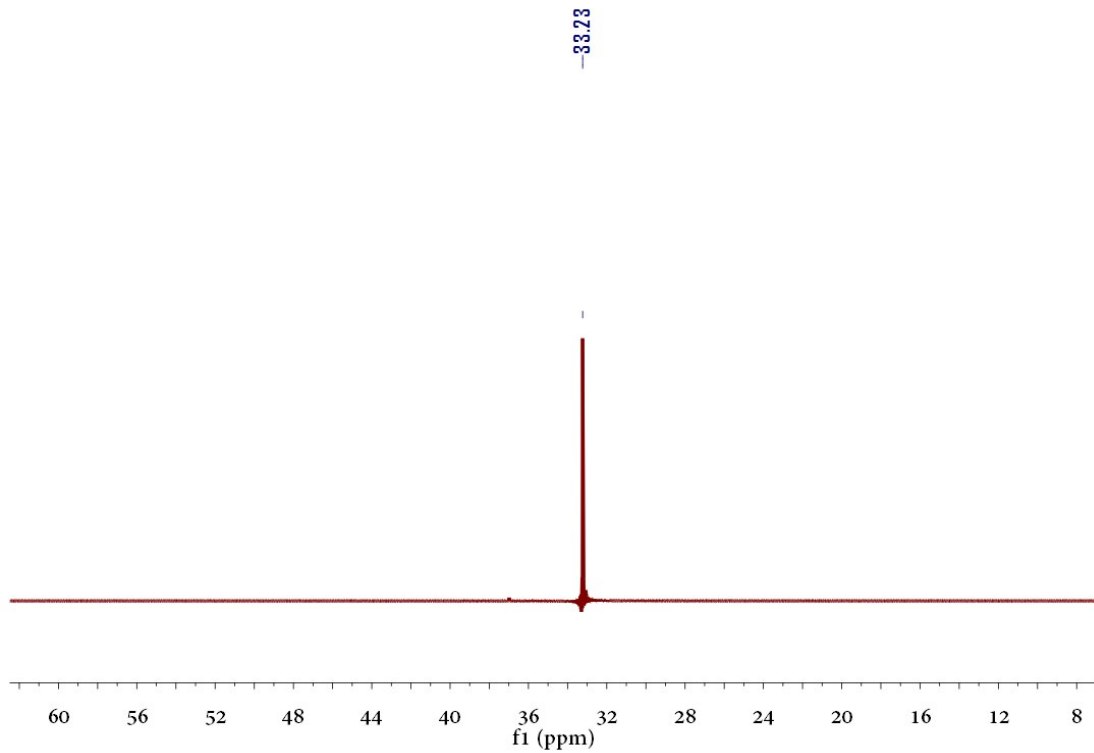

Fig. S10 The  $^{31}\text{P}$  NMR spectrum of  $[\text{P}_{4444}][\text{Lac}]$  ( $\text{D}_2\text{O}$ ).

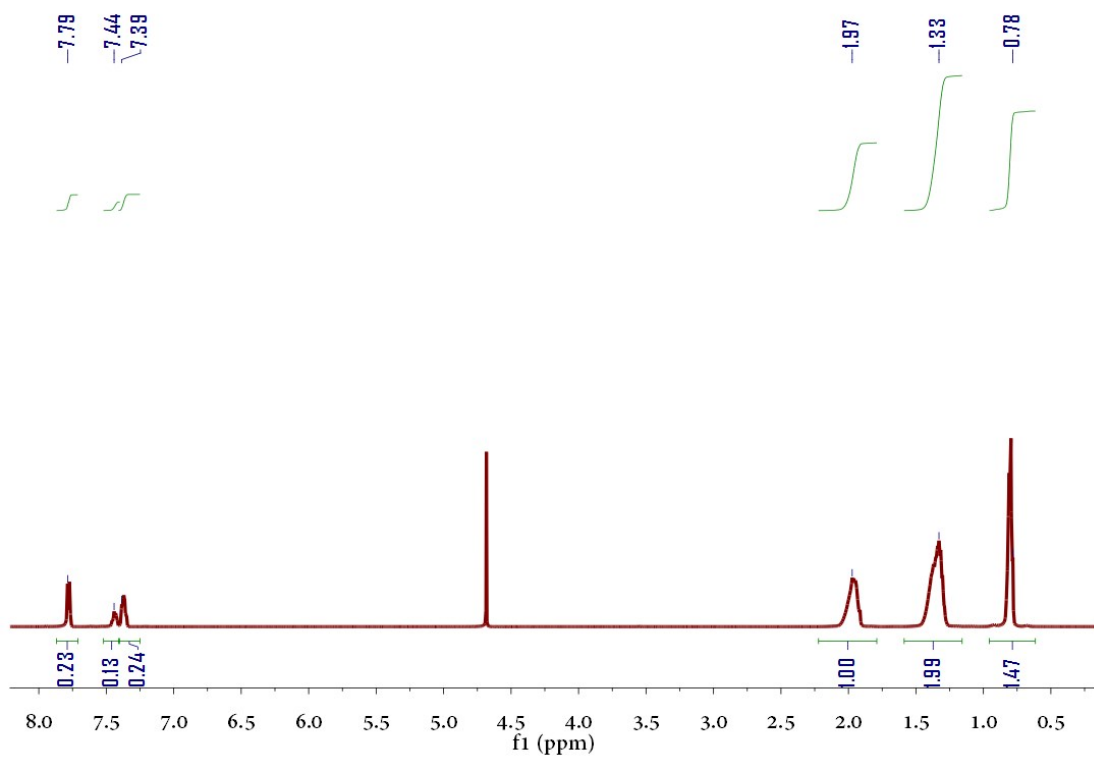

Fig. S11 The  $^1\text{H}$  NMR spectrum of  $[\text{P}_{4444}][\text{Bac}]$  ( $\text{D}_2\text{O}$ ).

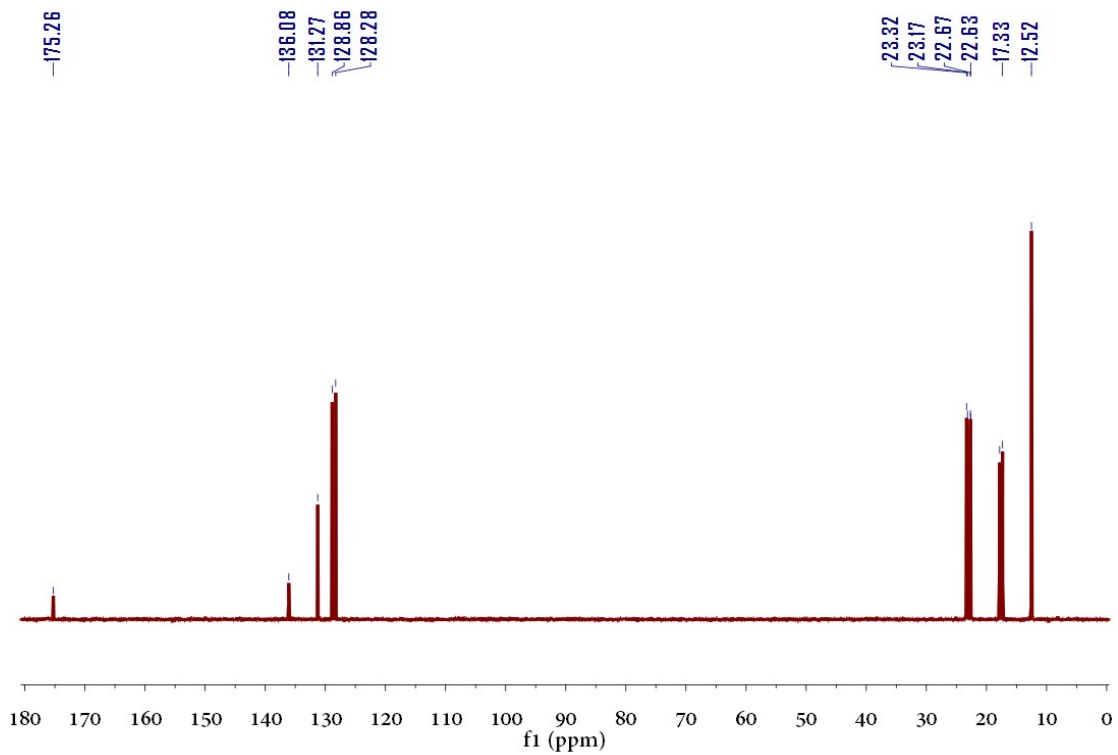

Fig. S12 The <sup>13</sup>C NMR spectrum of [P<sub>4444</sub>][BAC] (D<sub>2</sub>O).

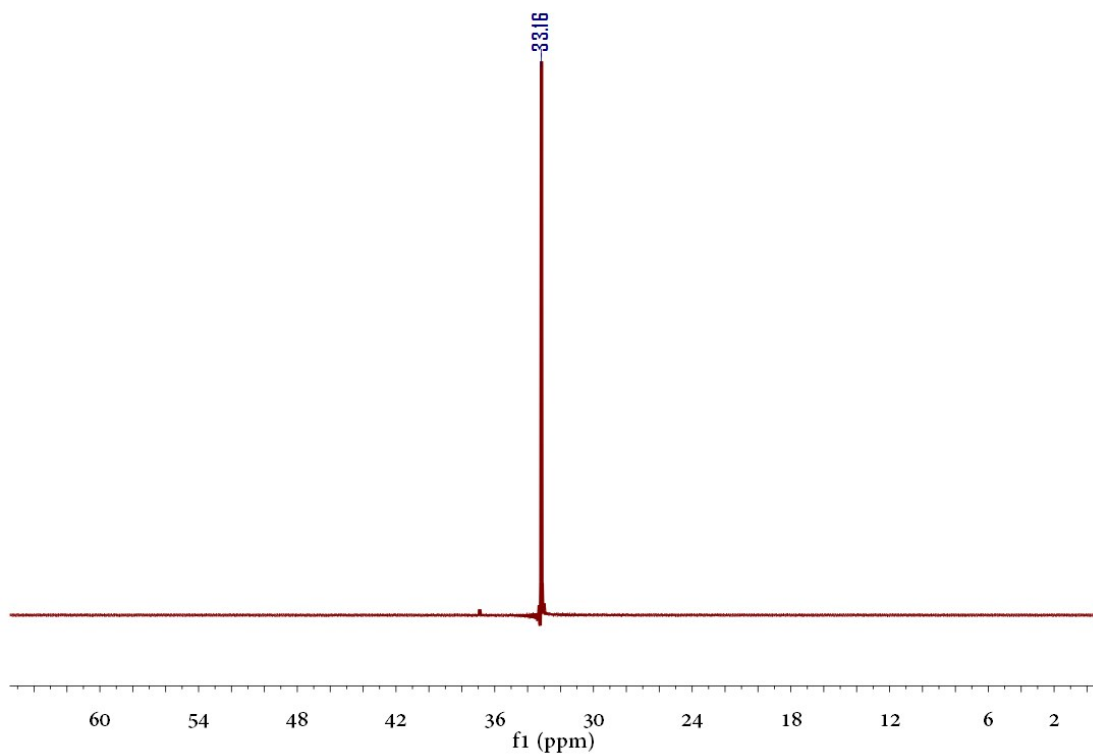

Fig. S13 The <sup>31</sup>P NMR spectrum of [P<sub>4444</sub>][BAC] (D<sub>2</sub>O).

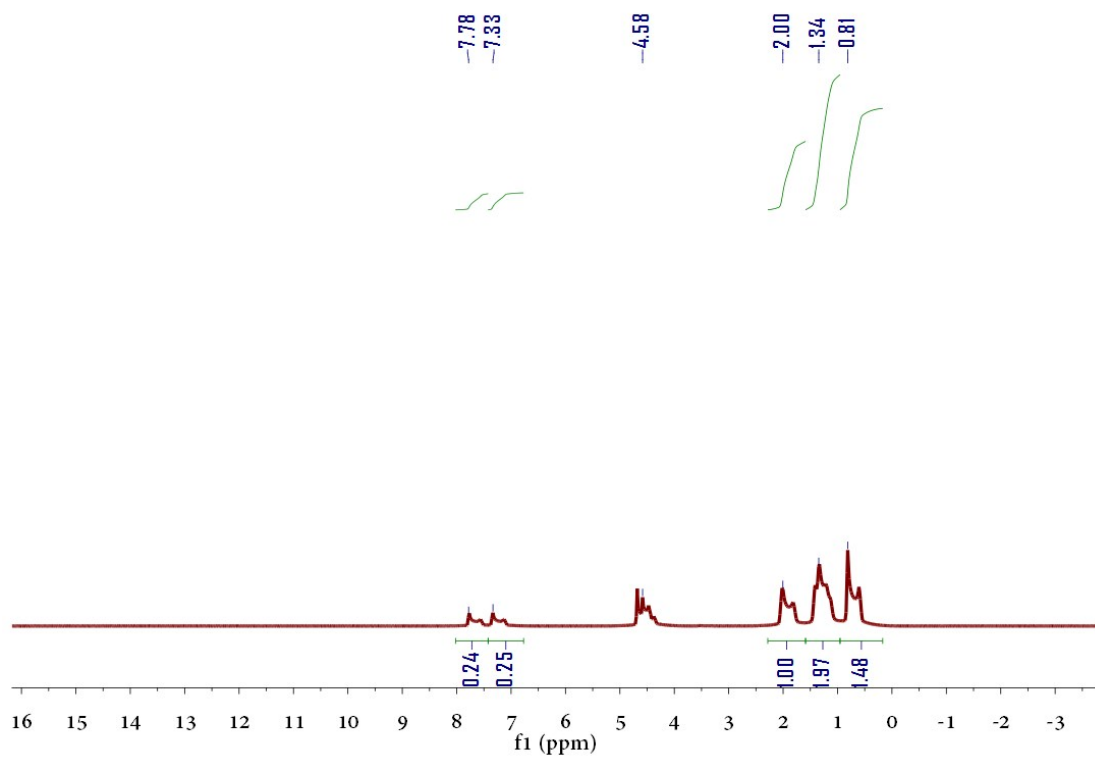

Fig. S14 The  $^1\text{H}$  NMR spectrum of  $[\text{P}_{4444}][\text{HMBAc}]$  ( $\text{D}_2\text{O}$ )

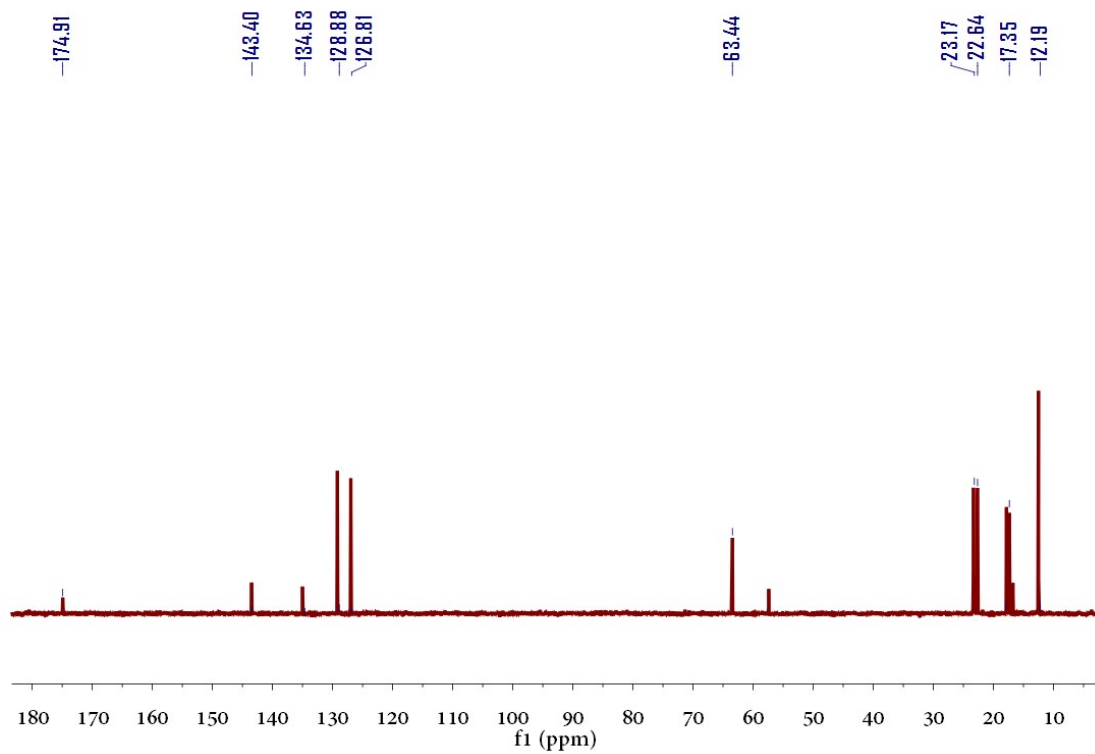

Fig. S15 The  $^{12}\text{C}$  NMR spectrum of  $[\text{P}_{4444}][\text{HMBAc}]$  ( $\text{D}_2\text{O}$ )



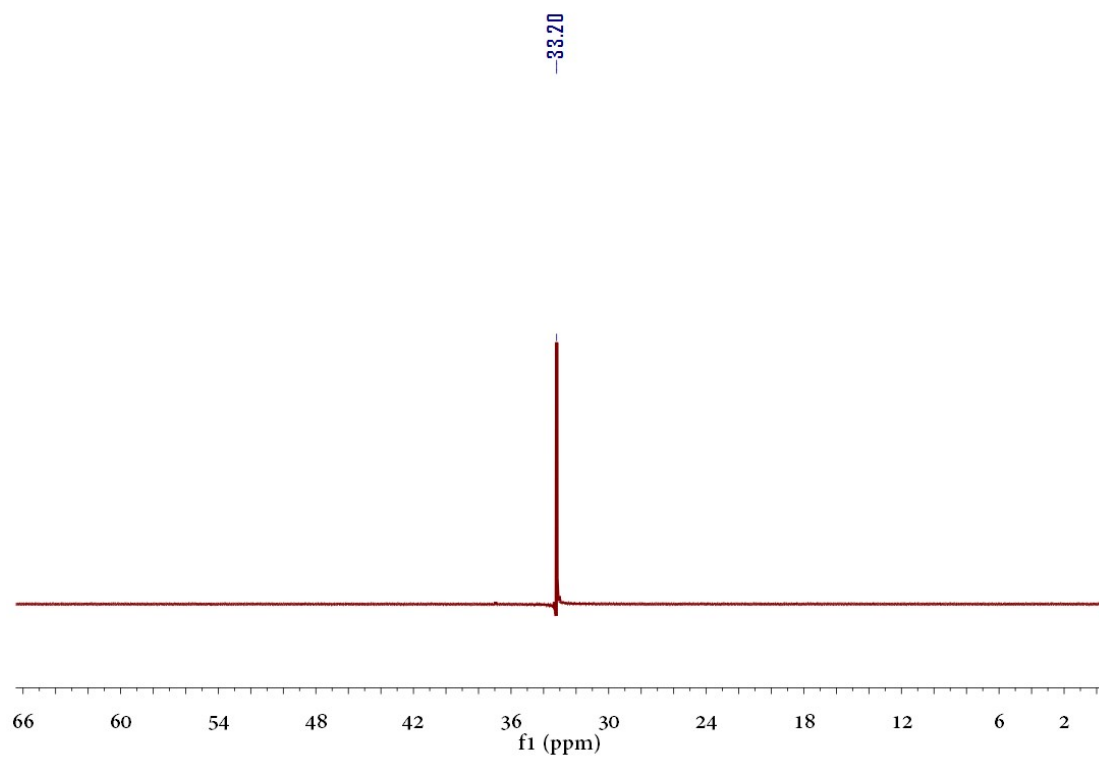

Fig. S16 The  $^{31}\text{P}$  NMR spectrum of  $[\text{P}_{4444}][\text{HMBAc}]$  ( $\text{D}_2\text{O}$ )

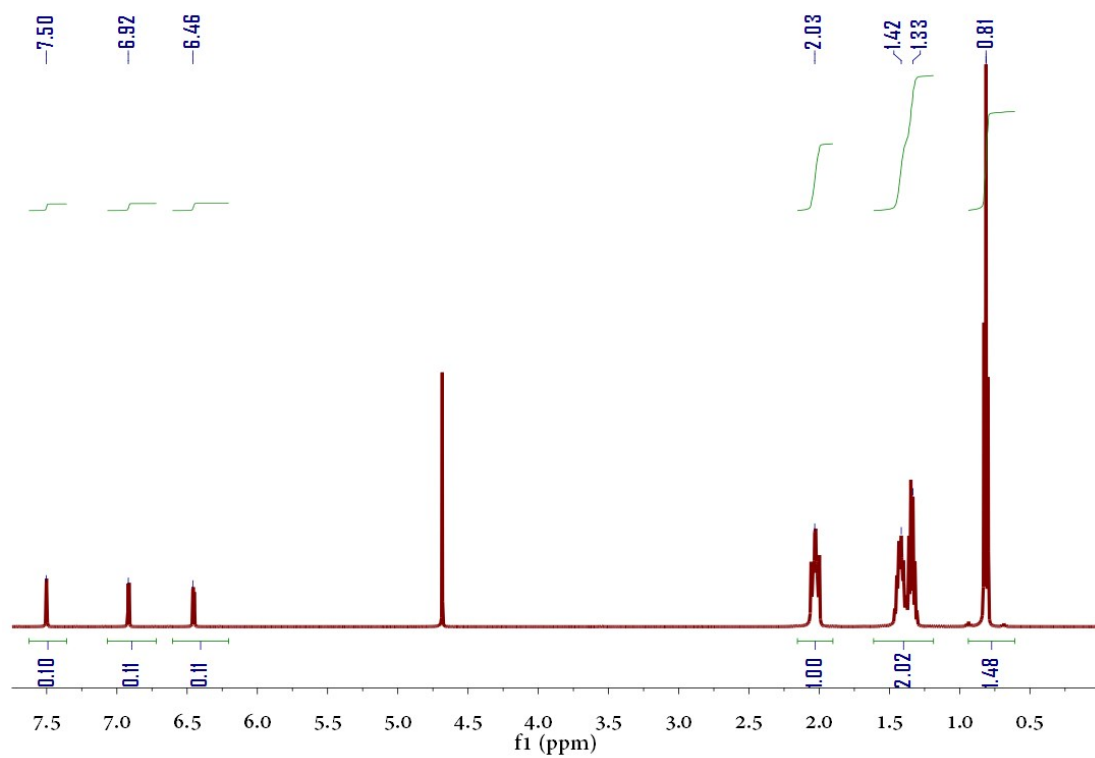

Fig. S17 The  $^1\text{H}$  NMR spectrum of  $[\text{P}_{4444}][\text{FAC}]$  ( $\text{D}_2\text{O}$ )

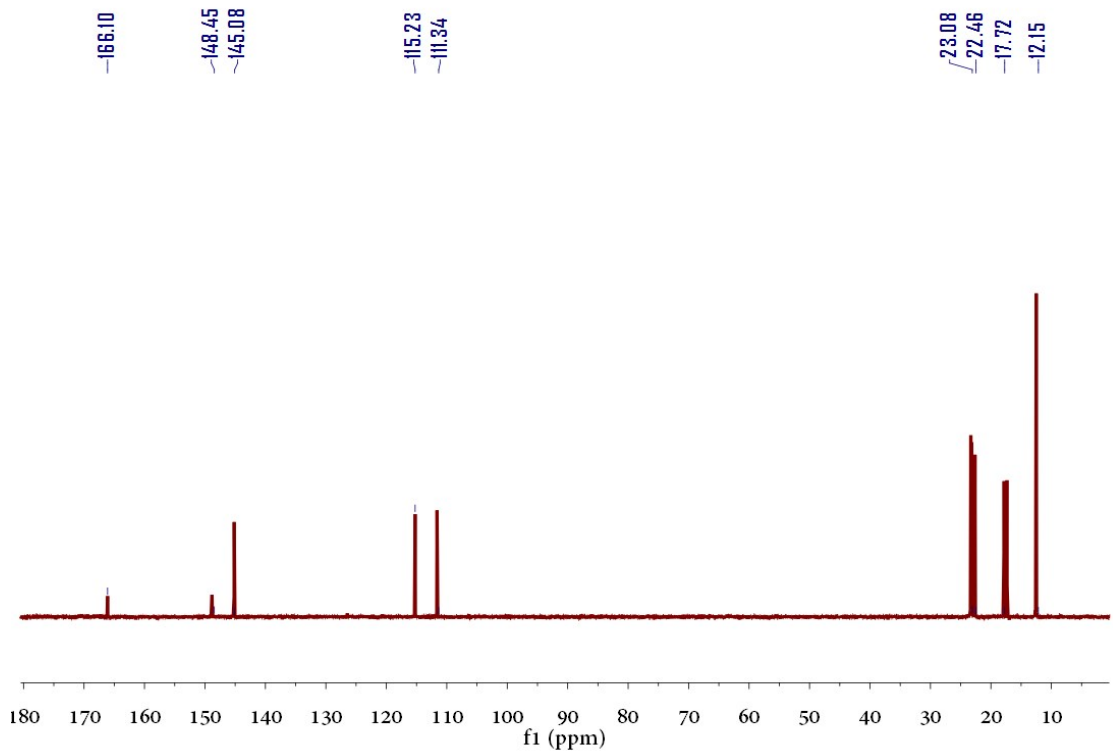

Fig. S18 The <sup>13</sup>C NMR spectrum of [P<sub>4444</sub>][FAC] (D<sub>2</sub>O)

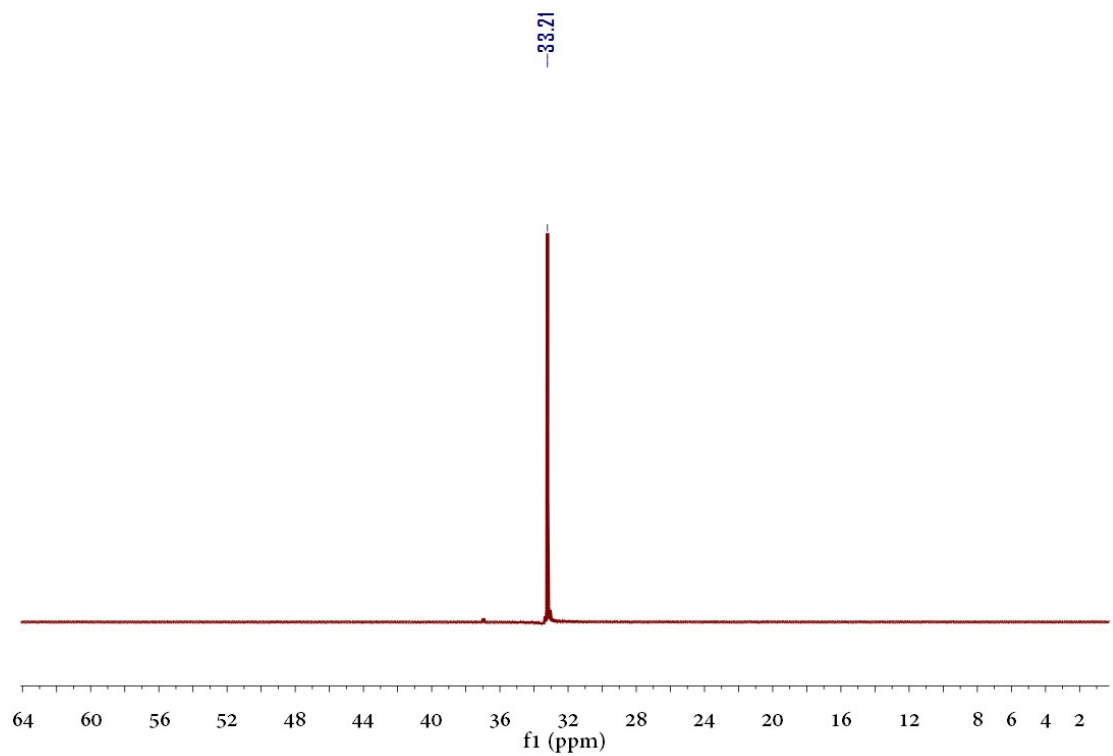

Fig. S19 The <sup>31</sup>P NMR spectrum of [P<sub>4444</sub>][FAC] (D<sub>2</sub>O).

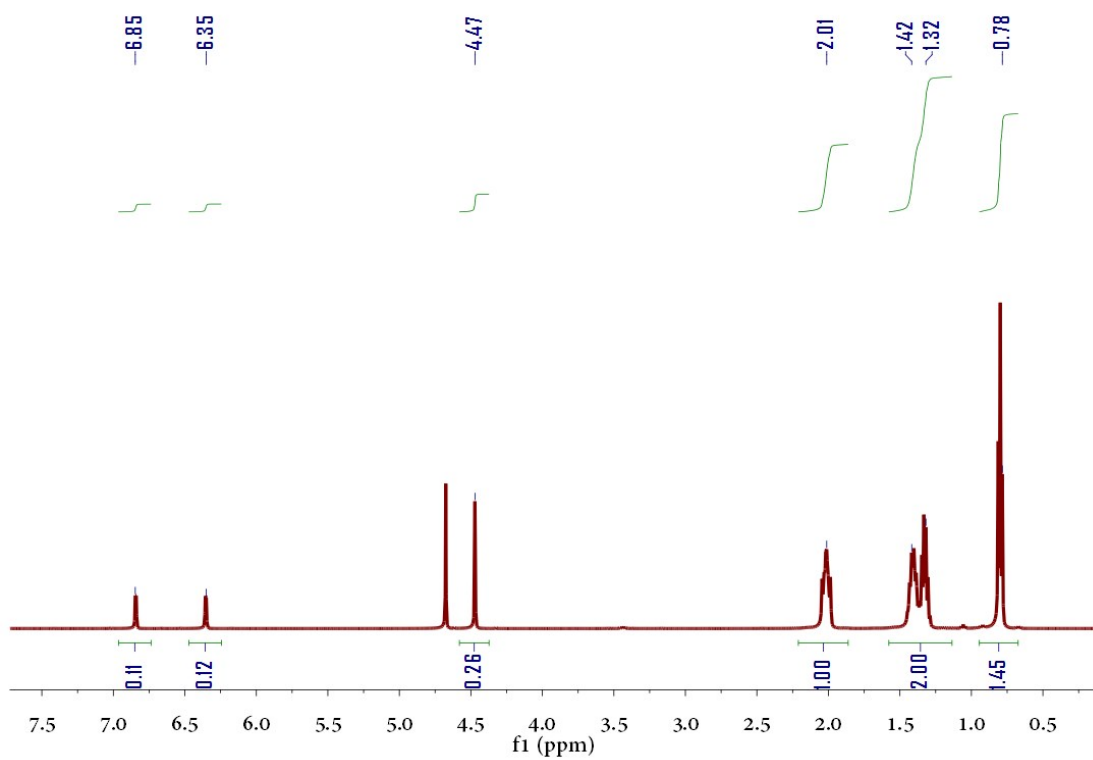

Fig. S20 The <sup>1</sup>H NMR spectrum of [P<sub>4444</sub>][HMFAc] (D<sub>2</sub>O)

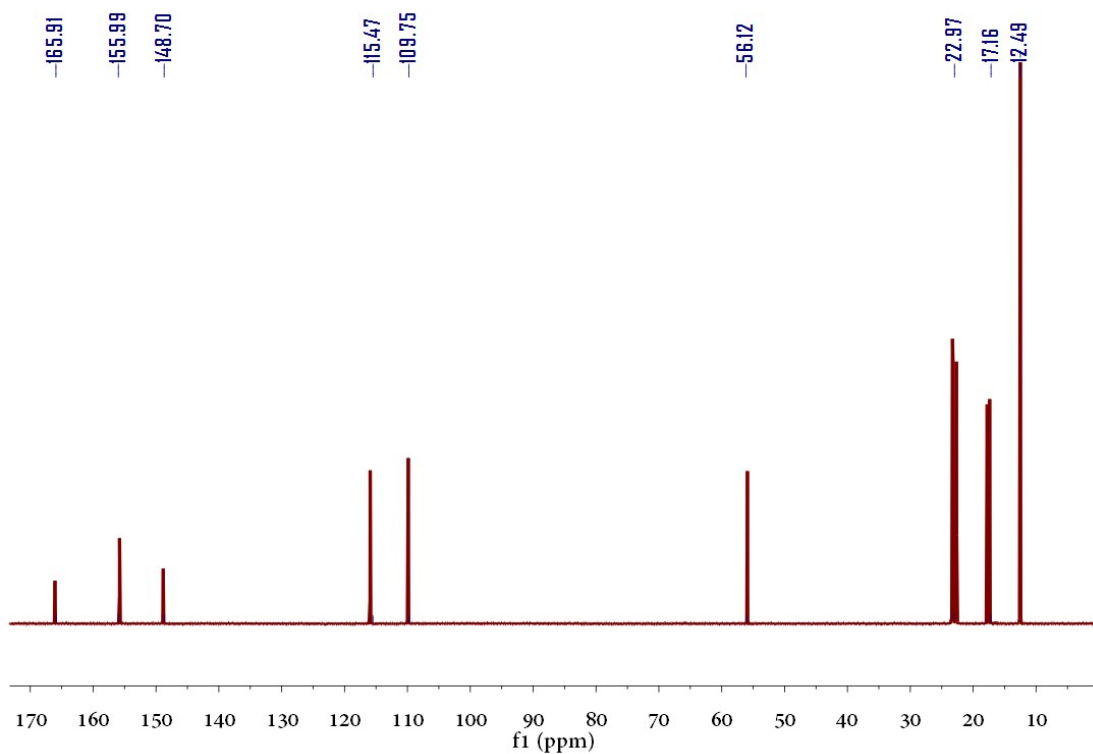

Fig. S21 The <sup>13</sup>C NMR spectrum of [P<sub>4444</sub>][HMFAc] (D<sub>2</sub>O)

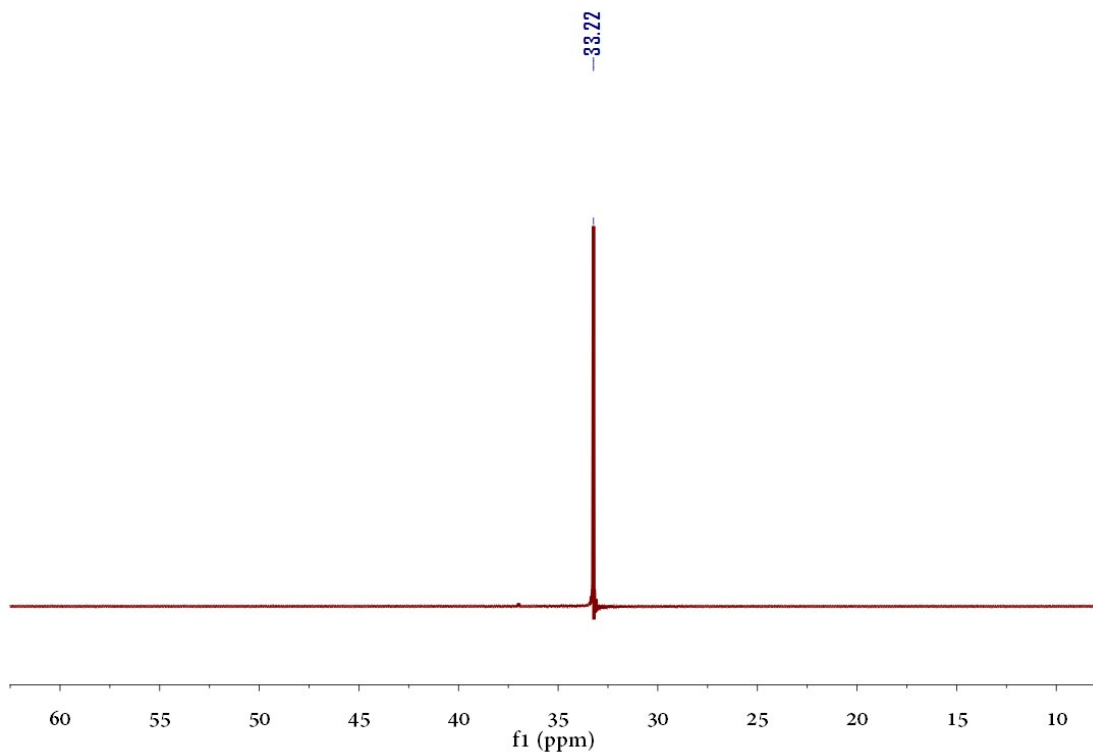

Fig. S22 The  $^{31}\text{P}$  NMR spectrum of  $[\text{P}_{4444}][\text{HMFAc}]$  ( $\text{D}_2\text{O}$ )

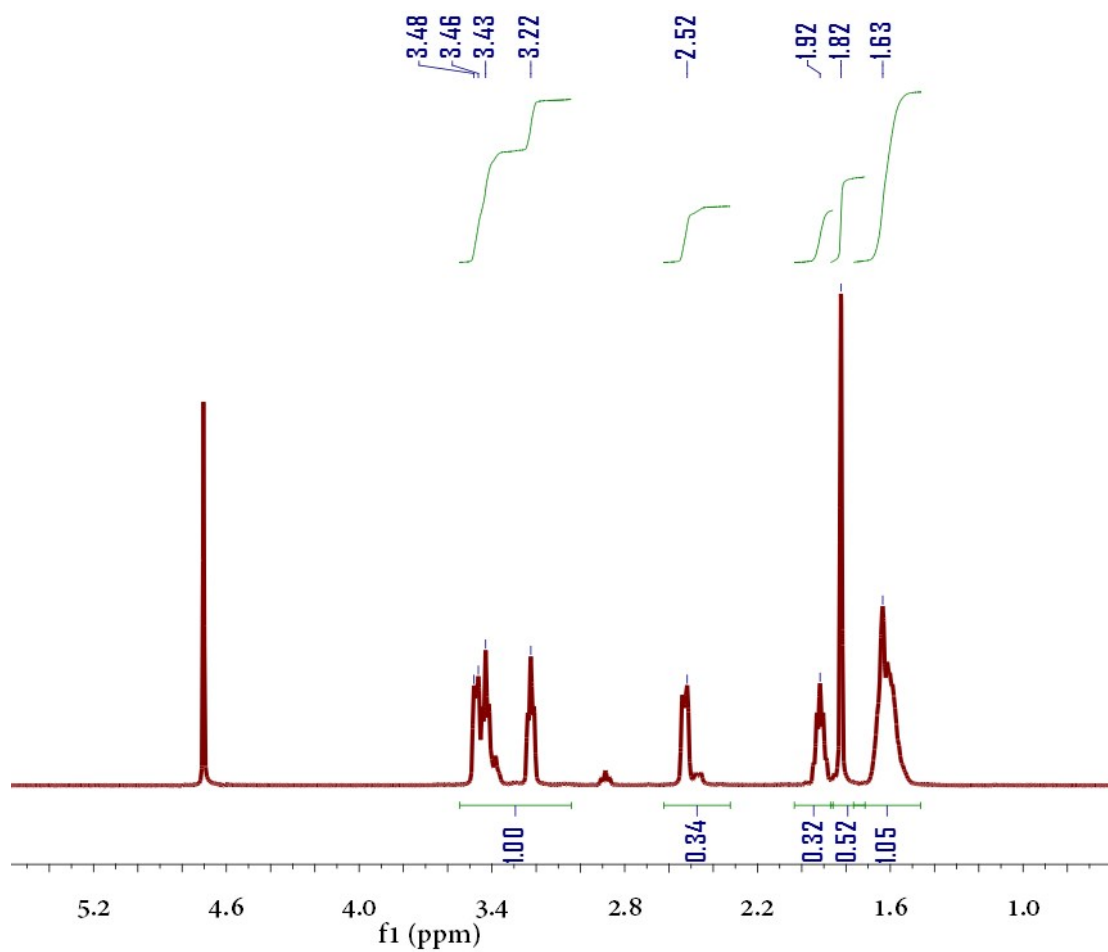

Fig. S23 The  $^1\text{H}$  NMR spectrum of  $[\text{DBU}][\text{OAc}]$  ( $\text{D}_2\text{O}$ )

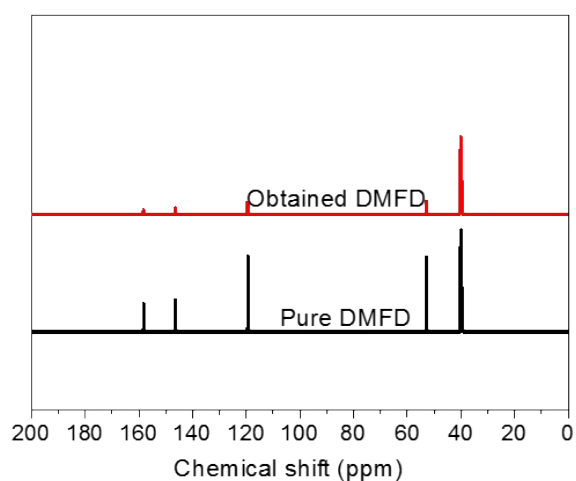

Fig. S24  $^{13}\text{C}$  NMR patterns of the obtained DMFD and the pure DMFD

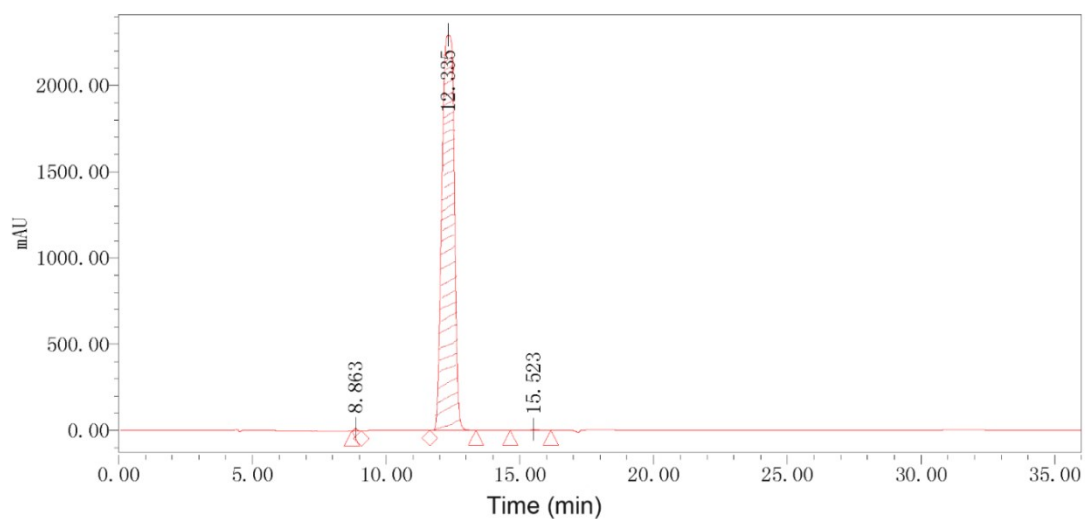

Fig. S25 HPLC spectrum of the obtained DMFD.

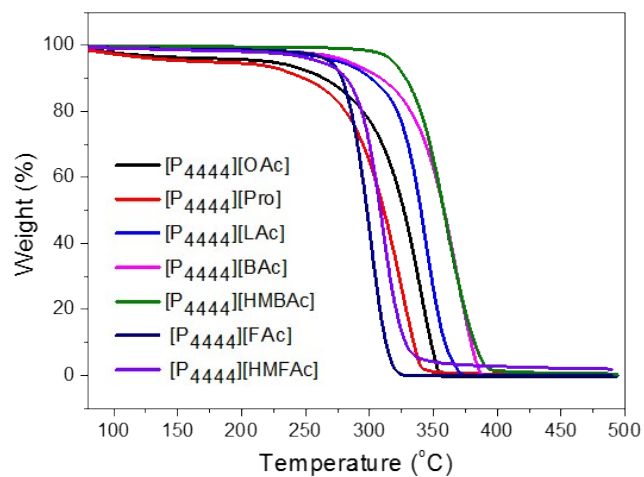

Fig. S26 TGA curves of tetrabutylphosphonium-based ILs

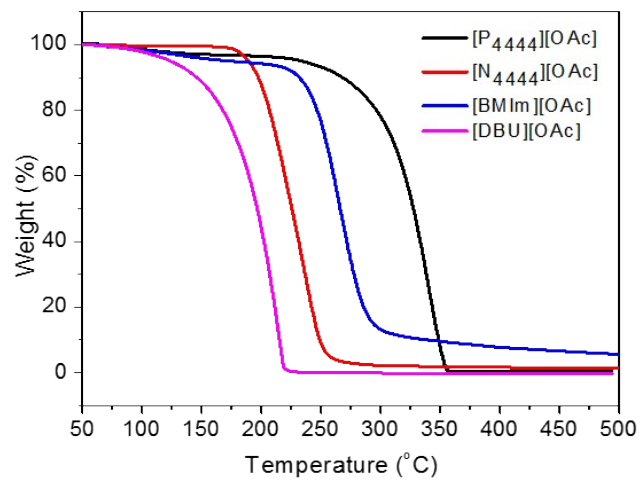

Fig. S27 TGA curves of acetate ILs.

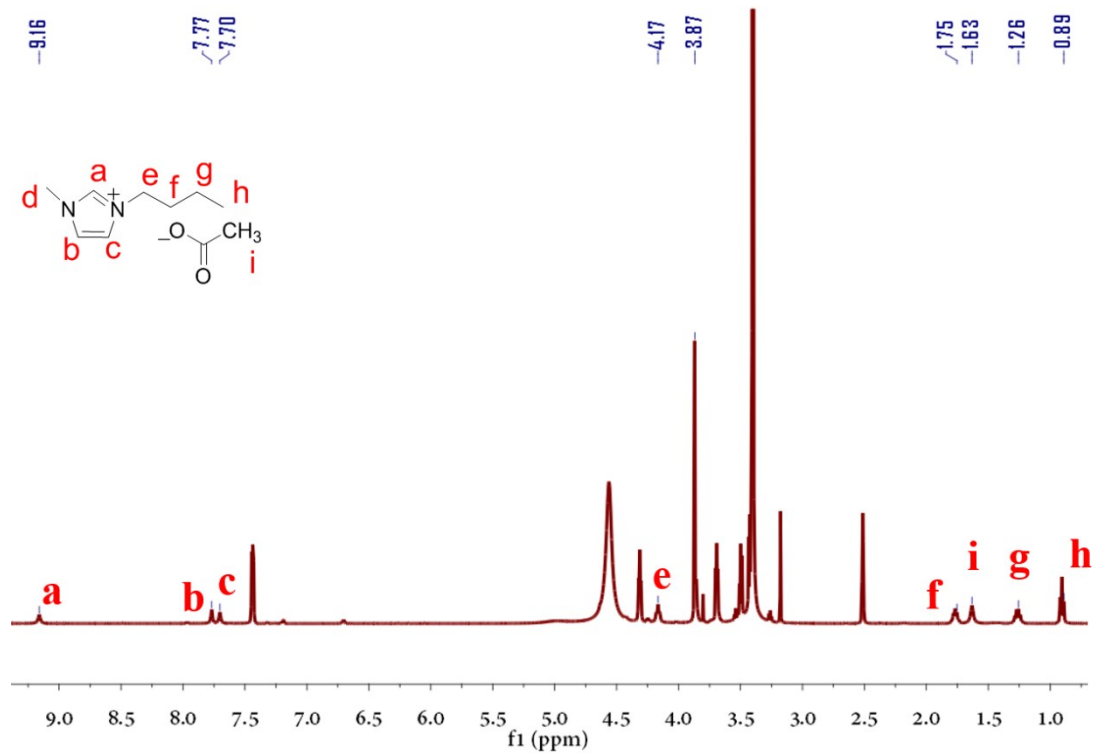

Fig. S28 <sup>1</sup>H NMR pattern of [BMIM][OAc] in the filtrate.

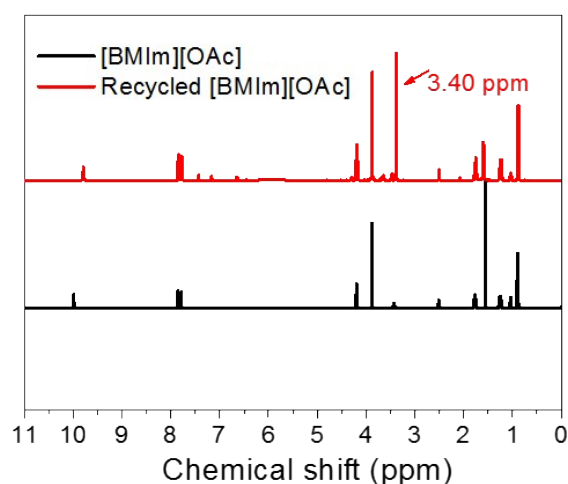

Fig. S29  $^1\text{H}$  NMR patterns of recycled [BMIM][OAc] and pristine [BMIm][OAc].

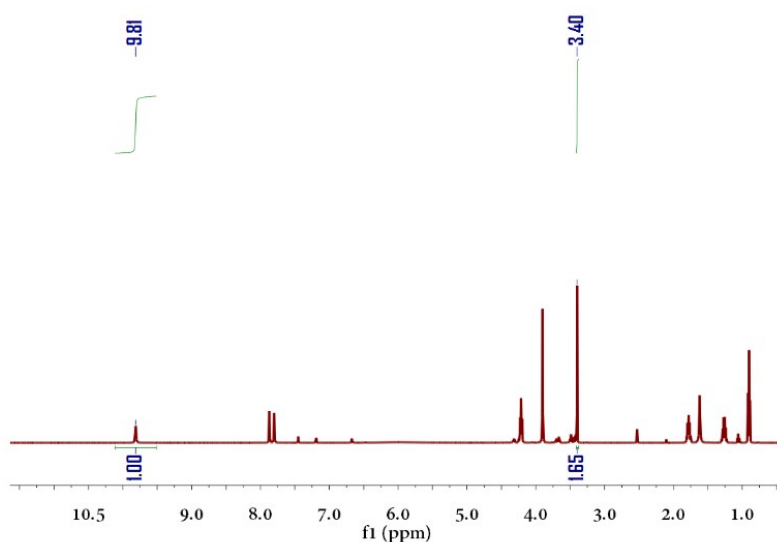

Fig. S30  $^1\text{H}$  NMR pattern of recycled [BMIM][OAc].

### Theoretical Method

The computations were carried out by using the Gaussian 16 program (Revision B01).<sup>[1]</sup> The theoretical method was the popular DFT-B3LYP<sup>[2-4]</sup> adding the D3 version of Grimme's dispersion with Becke-Johnson damping damping function.<sup>[5]</sup> The triple zeta turbomole basis set, Def2-TZVP, was used for the C, H, N, O atoms<sup>[6]</sup>.

### References

- [1] M. J. Frisch, G. W. Trucks, H. B. Schlegel, G. E. Scuseria, M. A. Robb, J. R. Cheeseman, G. Scalmani, V. Barone, G. A. Petersson, H. Nakatsuji, X. Li, M. Caricato, A. V. Marenich, J. Bloino, B. G. Janesko, R. Gomperts, B. Mennucci, H. P. Hratchian, J. V. Ortiz, A. F. Izmaylov, J. L. Sonnenberg, D. Williams-Young, F. Ding, F. Lipparini, F. Egidi, J. Goings, B. Peng, A. Petrone, T. Henderson, D. Ranasinghe, V. G. Zakrzewski, J. Gao, N. Rega, G. Zheng, W. Liang, M. Hada, M. Ehara, K. Toyota,

R. Fukuda, J. Hasegawa, M. Ishida, T. Nakajima, Y. Honda, O. Kitao, H. Nakai, T. Vreven, K. Throssell, J. A. Montgomery, Jr., J. E. Peralta, F. Ogliaro, M. J. Bearpark, J. J. Heyd, E. N. Brothers, K. N. Kudin, V. N. Staroverov, T. A. Keith, R. Kobayashi, J. Normand, K. Raghavachari, A. P. Rendell, J. C. Burant, S. S. Iyengar, J. Tomasi, M. Cossi, J. M. Millam, M. Klene, C. Adamo, R. Cammi, J. W. Ochterski, R. L. Martin, K. Morokuma, O. Farkas, J. B. Foresman, and D. J. Fox, Gaussian 16, Revision B.01, Gaussian, Inc., Wallingford CT, 2016.

[2] D. Becke, Density-functional exchange-energy approximation with correct asymptotic-behavior. *Phys. Rev. A*, 1988, 38, 3098-3100.

[3] A. D. Becke, Density-functional thermochemistry. III. The role of exact exchange. *J. Chem. Phys.*, 1993, 98, 5648-5652.

[4] C. Lee, W. Yang, R. G. Parr, Development of the Colle-Salvetti correlation-energy formula into a functional of the electron density. *Phys. Rev. B*, 1988, 37, 785-789.

[5] S. Grimme, S. Ehrlich, L. Goerigk, Effect of the damping function in dispersion corrected density functional theory. *J. Comput. Chem.*, 2011, 32, 1456-1465.

[6] F. Weigend, R. Ahlrichs. Balanced basis sets of split valence, triple zeta valence and quadruple zeta valence quality for H to Rn: Design and assessment of accuracy. *Phys. Chem. Chem. Phys.*, 2005, 7, 3297-3305.
